# Supplementary material
Source: publisher figshare collection journal article supplement (https://gsapubs.figshare.com/ndownloader/files/30991285)
Supplement: Supplementary file 1 [file 30991285]

## Sheet: Sheet1
distance cross slope (m)	normalized number of grains (bin=0.05m)
	CS1			CS2			CS3
	T*=0	T*=35300	T*=66400	T*=0	T*=35300	T*=66400	T*=0	T*=35300	T*=66400
(-0.375, -0.325)	0.0991501	0.0325596	0.0156863	0.122108	0.0729746	0.0379267	0.122283	0.0898773	0.0604192
(-0.325, -0.275)	0.109065	0.0490006	0.0222222	0.0809769	0.102659	0.0442478	0.0978261	0.116564	0.0715166
(-0.275, -0.225)	0.0566572	0.0612508	0.0352941	0.0694087	0.0729746	0.0442478	0.0570652	0.0837423	0.0567201
(-0.225, -0.175)	0.0509915	0.0738233	0.0888889	0.062982	0.0596784	0.05689	0.0679348	0.0542945	0.0628853
(-0.175, -0.125)	0.0410765	0.0705996	0.141176	0.0514139	0.0541126	0.0897598	0.0394022	0.053681	0.0863132
(-0.125, -0.075)	0.0453258	0.0863959	0.129412	0.0501285	0.063389	0.0859671	0.0529891	0.0503067	0.0850801
(-0.075, -0.025)	0.0609065	0.105738	0.115033	0.0385604	0.0686456	0.12263	0.044837	0.057362	0.0900123
(-0.025, 0.025)	0.0609065	0.0838169	0.10719	0.0398458	0.0751391	0.158028	0.0543478	0.0546012	0.112207
(0.025, 0.075)	0.0637394	0.0950999	0.124183	0.066838	0.0711194	0.10493	0.0638587	0.0680982	0.107275
(0.075, 0.125)	0.0467422	0.0831721	0.0901961	0.0616967	0.0667904	0.0720607	0.076087	0.0622699	0.0641184
(0.125, 0.175)	0.0679887	0.0912315	0.0627451	0.0835476	0.0670996	0.0707965	0.0679348	0.0674847	0.0591862
(0.175, 0.225)	0.0949008	0.0686654	0.0352941	0.096401	0.0602968	0.0480405	0.0910326	0.0671779	0.0604192
(0.225, 0.275)	0.106232	0.0496454	0.0196078	0.0912596	0.0717378	0.022756	0.0652174	0.0733129	0.0480888
(0.275, 0.325)	0.0963173	0.040619	0.0117647	0.0771208	0.0757576	0.0417193	0.0910326	0.0855828	0.0320592
(0.325, 0.375)	0	0.00838169	0.00130719	0.00771208	0.0176252	0	0.00815217	0.0156442	0.00369914
Total number of grains	706	3102	765	778	3234	791	736	3260	811

## Sheet: G49286
Sun, Z., et al., 2021, Formation of low-gradient bedrock chutes by dry rockfall on planetary surfaces: Geology, https://doi.org/10.1130/G49286.1
